# Supplementary material
Source: PubMed Central journal article supplement (PMC3859845)
Supplement: NIHMS510349-supplement-Supp_Table_S1.pdf [file NIHMS510349-supplement-Supp_Table_S1.pdf]

**Supplemental Table 1.**

N=164

|                  | <b>POSITIVE OCCASION SETTER</b> |               |                          |               |
|------------------|---------------------------------|---------------|--------------------------|---------------|
|                  | <b>5 min time point</b>         |               | <b>30 min time point</b> |               |
|                  | <b>Adolescents</b>              | <b>Adults</b> | <b>Adolescents</b>       | <b>Adults</b> |
| <b>0.75 g/kg</b> | 7 (5)                           | 8             | 8 (6)                    | 8 (6)         |
| <b>1.0 g/kg</b>  | 8 (7)                           | 8             | 8 (7)                    | 8 (6)         |
| <b>1.25 g/kg</b> | 7                               | 7 (6)         | 7 (6)                    | 7 (6)         |

*Final adolescent n = 38*

*Final adult n = 40*

|                  | <b>NEGATIVE OCCASION SETTER</b> |               |                          |               |
|------------------|---------------------------------|---------------|--------------------------|---------------|
|                  | <b>5 min time point</b>         |               | <b>30 min time point</b> |               |
|                  | <b>Adolescents</b>              | <b>Adults</b> | <b>Adolescents</b>       | <b>Adults</b> |
| <b>0.75 g/kg</b> | 6                               | 6             | 6                        | 6 (5)         |
| <b>1.0 g/kg</b>  | 6                               | 7             | 6                        | 7 (5)         |
| <b>1.25 g/kg</b> | 5 (4)                           | 6             | 6                        | 6             |

*Final adolescent n = 32*

*Final adult n = 35*
