# Supplementary material
Source: PubMed Central journal article supplement (PMC3859845)

Supplemental Figure 1.

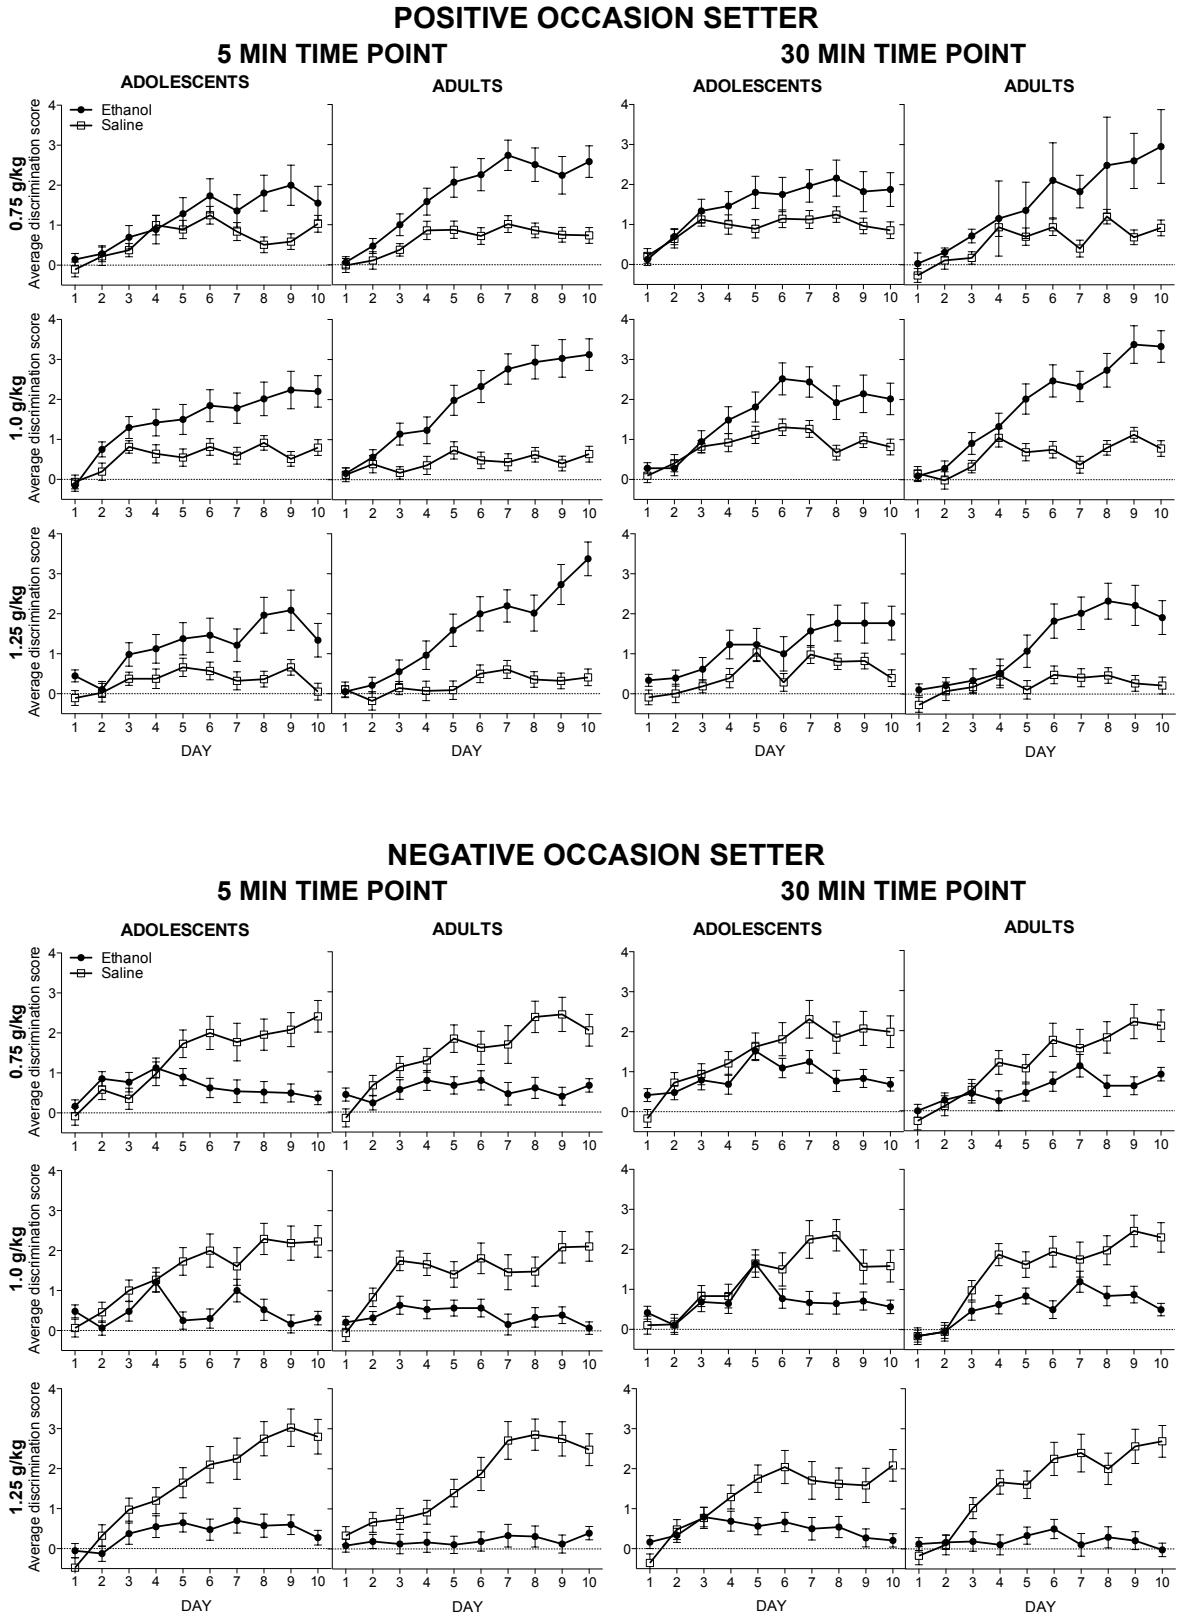

Supplement: NIHMS510349-supplement-Supp_Fig_S1.pdf [file NIHMS510349-supplement-Supp_Fig_S1.pdf]

Supplemental Figure 2.

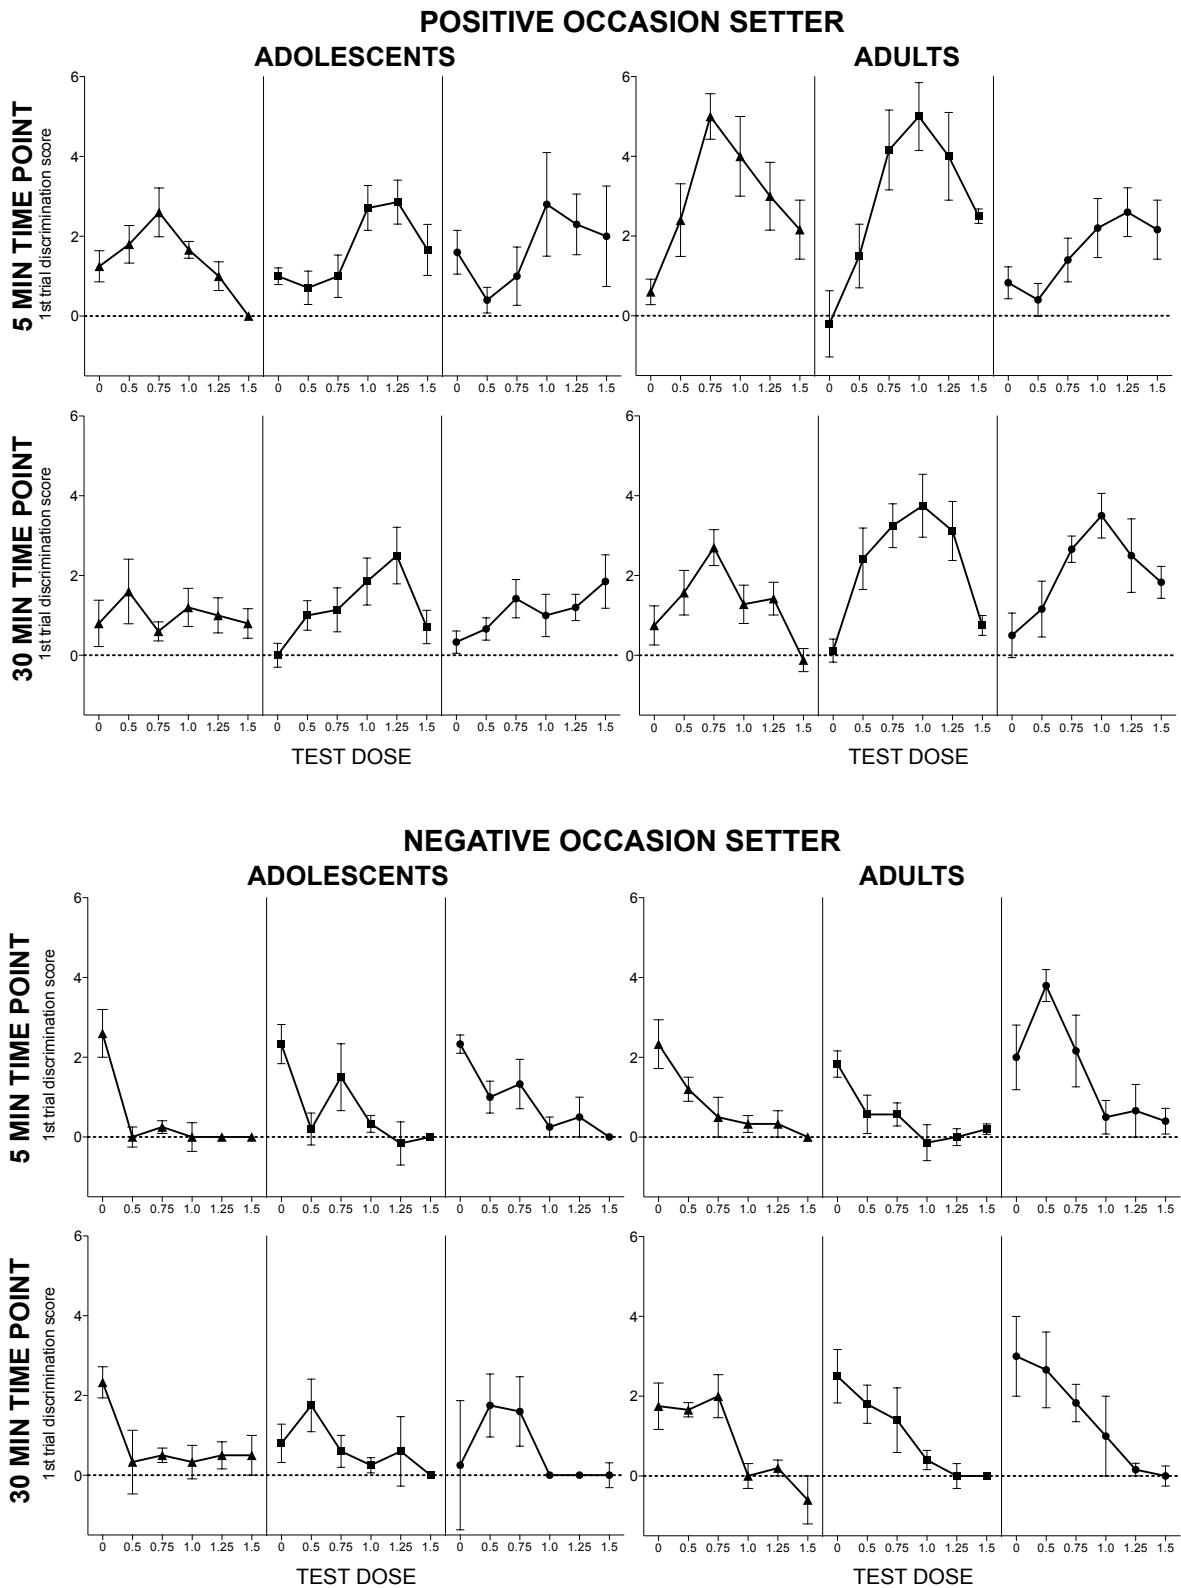

Supplement: NIHMS510349-supplement-Supp_Fig_S2.pdf [file NIHMS510349-supplement-Supp_Fig_S2.pdf]
